# Supplementary material for: Mutations in myosin S2 alter cardiac myosin-binding protein-C interaction in hypertrophic cardiomyopathy in a phosphorylation-dependent manner
Source: PubMed Central journal article supplement (PMC8239744; doi:10.1016/j.jbc.2021.100836), 2021-05-27
Supplement: mmc1.pdf [file mmc1.pdf]

**Supporting Data Information**

**Mutations in myosin S2 alter cardiac myosin binding protein-C interaction in hypertrophic cardiomyopathy in a phosphorylation-dependent manner**

**Rohit R. Singh<sup>1</sup>, James W. McNamara<sup>1</sup> and Sakthivel Sadayappan<sup>1\*</sup>**

<sup>1</sup>From the Heart, Lung and Vascular Institute, Department of Internal Medicine, Division of Cardiovascular Health and Disease, University of Cincinnati, Cincinnati, OH 45236

**Running title:** Interaction of Myosin S2 and cMyBP-C in HCM

\*To whom correspondence should be addressed: Sakthivel Sadayappan, PhD, MBA, Heart, Lung and Vascular Institute, Department of Internal Medicine, University of Cincinnati, 231 Albert Sabin Way, Cincinnati, OH 45267, USA. Phone: +15135587498. Email: [sadayasl@ucmail.uc.edu](mailto:sadayasl@ucmail.uc.edu)

Supplemental Figures

|                               |                                                                  |     |
|-------------------------------|------------------------------------------------------------------|-----|
| 070468   <i>Mybpc3</i> _MOUSE | MPEPGKKPVSAFNKKPRSAEVTAGSAAVFEAETERSGVMVRWQRDGS DITANDKYGLAAE    | 60  |
| Q14896   <i>MYBPC3</i> _HUMAN | MPEPGKKPVSAFSSKPRSEVAAGSPAVFEAETERAGVKVRWQRGGSDISASNKYGLATE      | 60  |
|                               | *****:.* ** . ** : ** ***** : ** ***** . *** : . : ***** *       |     |
| 070468   <i>Mybpc3</i> _MOUSE | GKRHTLTVRDAS PDDQGSYAVIAGSSKVKFDLKVTEPAPPEK-----AESEVAPGAPEEV    | 115 |
| Q14896   <i>MYBPC3</i> _HUMAN | GTRHTLTVREVGPADQGSYAVIAGSSKVKFDLKVIEAEKAE PMLAPAPAPAEATGAPGAEV   | 120 |
|                               | *.*****:..* ***** ***** * * * * * * * * * * * * * * * *          |     |
| 070468   <i>Mybpc3</i> _MOUSE | PAPATELEESVSSPEGSVSVTQDGSAAEHQGAPDDPIGLFLMRPQDGEVTVGGSI VFSAR    | 175 |
| Q14896   <i>MYBPC3</i> _HUMAN | PAPAAELGESAPSFKGSSS AALNG--PTPGAPDDPIGLFVMRPQDGEVTVGGSI TFSAR    | 177 |
|                               | *****: ** ** . ** : ** * . : : * ***** : ***** . ***             |     |
| 070468   <i>Mybpc3</i> _MOUSE | VAGASLLKPPVVKWFKGKWDLSKVGQHLQLHDSYDRASKVYLFELHITDAQTTSAGGY       | 235 |
| Q14896   <i>MYBPC3</i> _HUMAN | VAGASLLKPPVVKWFKGKWDLSKVGQHLQLHDSYDRASKVYLFELHITDAQPAFTGSY       | 237 |
|                               | *****: ***** : : *                                               |     |
| 070468   <i>Mybpc3</i> _MOUSE | RCEVSTKDKFDSCNFNLT VHEAIGSGDLDLRS AFRR TSLAGARRIS DSHEDAGTPDFSS  | 295 |
| Q14896   <i>MYBPC3</i> _HUMAN | RCEVSTKDKFDSCNFNLT VHEAMGTGDL DLLSAFRRTSLAGGRRIS DSHEDT GILD FSS | 297 |
|                               | *****: ***** : ***** ***** * * * * * * * * * * * * * * * *       |     |
| 070468   <i>Mybpc3</i> _MOUSE | LLKKRDSFR--RDSKLEAPAEEDVWEILRQAPPSEYERIAFQHGVEACHRPLKRLKGMKQ     | 353 |
| Q14896   <i>MYBPC3</i> _HUMAN | LLKKRDSFRTPRDSKLEAPAEEDVWEILRQAPPSEYERIAFQYGVTDLRGMLKRLKGMRR     | 357 |
|                               | *****: ** ***** : * : ***** :                                    |     |
| 070468   <i>Mybpc3</i> _MOUSE | DEKKSTAFQKKLEPAYQVNKGHKIRLTVELADPDAEVKWLKNGQEI QMSGSKYIFESVGA    | 413 |
| Q14896   <i>MYBPC3</i> _HUMAN | DEKKSTAFQKKLEPAYQVSKGHKIRLTVELADHDAEVKWLKNGQEI QMSGSKYIFESIGA    | 417 |
|                               | *****: ***** ***** ***** ***** ***** : *                         |     |
| 070468   <i>Mybpc3</i> _MOUSE | KRTLTI SQSLADDAAYQC VVGGEKCSTELFVKEP 448                         |     |
| Q14896   <i>MYBPC3</i> _HUMAN | KRTLTI SQSLADDAAYQC VVGGEKCSTELFVKEP 452                         |     |
|                               | *****                                                            |     |

**Figure S1: Amino acid sequence alignment (Clustal W) for C0-C2 domains of cMyBP-C between mouse (*Mybpc3*) and human (*MYBPC3*).** The sequence alignment of the C0 (green), C1 (yellow), M (pink) and C2 domains (cyan). PKA phosphorylatable serines are in grey. Conserved amino acid residues are indicated by asterisk '\*'; colon ':' represents conserved amino acids with strongly similar properties, and period '.' represents conserved residues with weakly similar properties. Percent Identity Matrix gave a score of 83.82% of identity between the C0-C2 domain of mouse and human cMyBP-C. O70468 and Q14896 are UniProt IDs for *MYBPC3* of mouse and human, respectively.

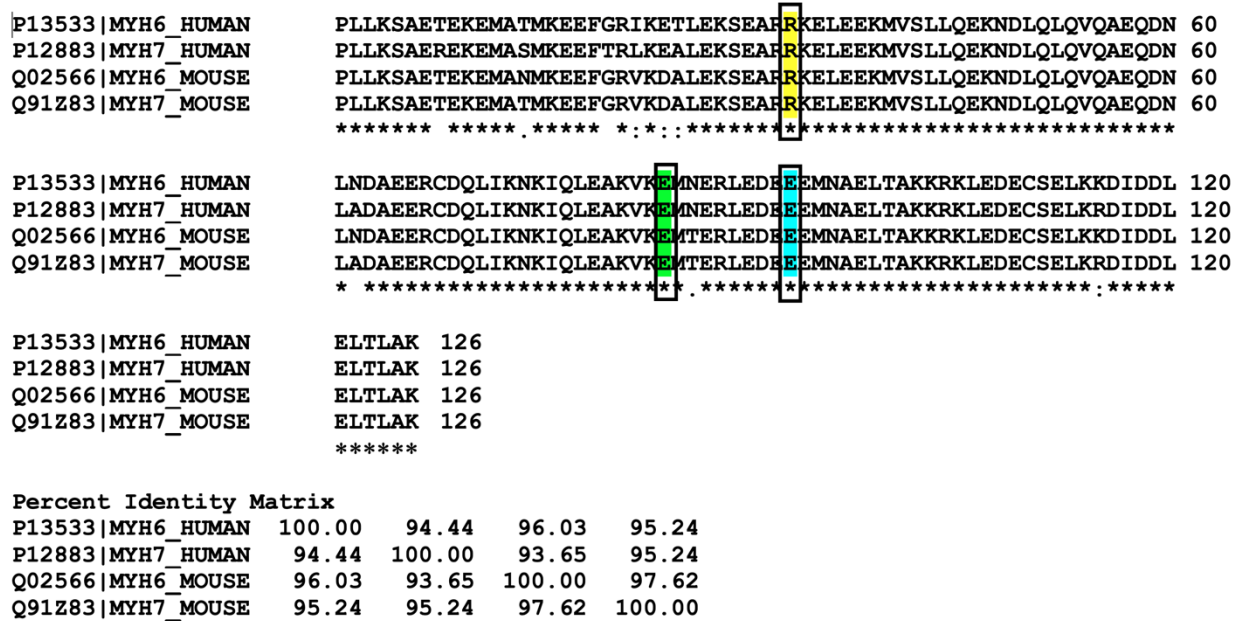

**Figure S2: Proximal myosin S2 126 amino acid sequence alignment (Clustal W) for  $\alpha$ -myosin heavy chain (*MYH6*) and  $\beta$ -myosin heavy chain (*MYH7*) between mouse and human.** Highlighted residues are indicative of conserved amino acids for HCM mutations (R870H (Yellow), E924K (green) and E930 $\Delta$  (cyan)) in human *MYH7*. Conserved amino acid residues are indicated by asterisk '\*'; colon ':' represents conserved amino acids with strongly similar properties, and period '.' represents conserved residues with weakly similar properties. Percent Identity Matrix gave a score of greater than 92% identity between proximal myosin S2 of mouse and human  $\alpha$  and  $\beta$  myosin heavy chain. P13533 and P12883 are UniProt IDs of *MYH6* and *MYH7* for human, respectively. Q02566 and Q91Z83 are Uniprot IDs of *MYH6* and *MYH7* for mouse, respectively.

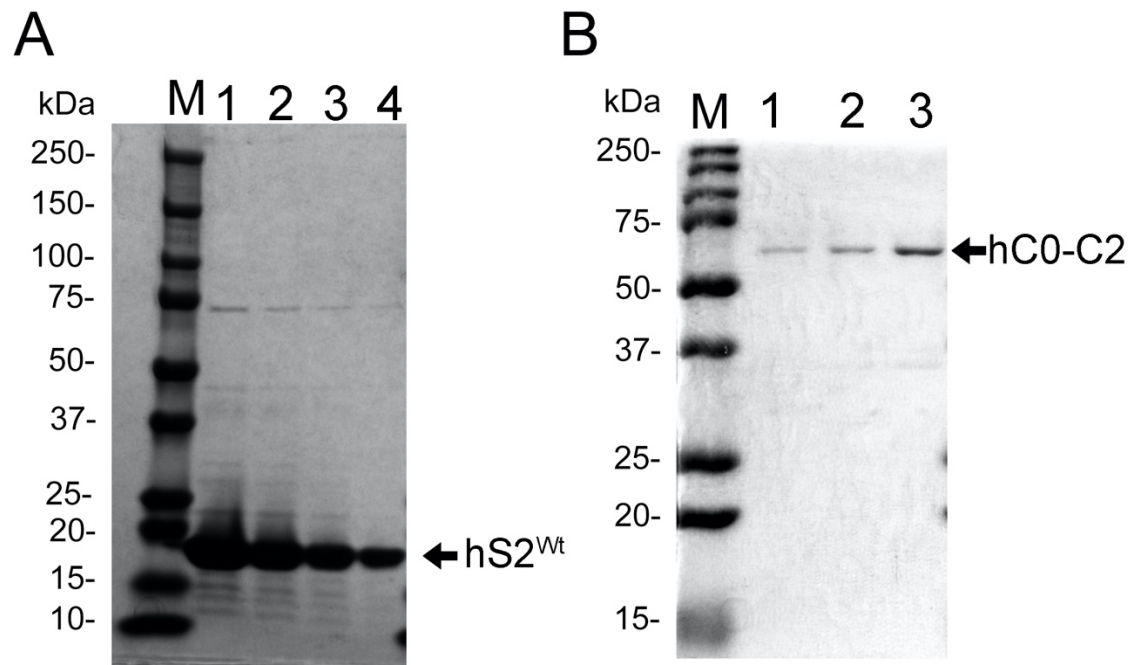

**Figure S3. Representative images of Coomassie-stained SDS-PAGE gel showing the purified recombinant hS2<sup>Wt</sup> and hC0-C2 proteins.** Various concentrations of NiNTA-purified recombinant (A) hS2<sup>Wt</sup> (Lane 1, 7.5 μg; Lane 2, 5.0 μg; Lane 3, 2.5 μg and Lane 4, 1.0 μg) and (B) hC0-C2 proteins (Lane 1, 100 ng; Lane 2, 200 ng and Lane 3, 300 ng) were loaded onto 4-15% gradient SDS-PAGE and stained with Coomassie blue for imaging. Precision Plus Protein Dual Color Standards (BioRad Catalog # 1610374) were used for standard molecular weight markers.

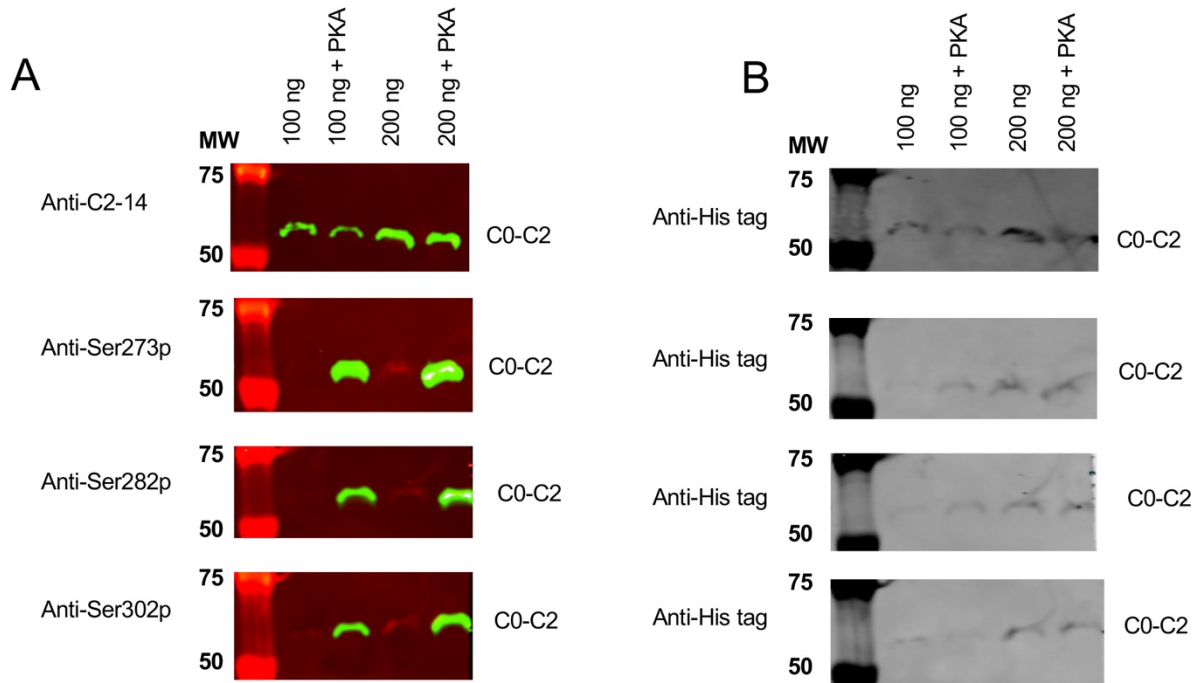

**Figure S4. Phosphorylation of recombinant hC0-C2 proteins by PKA treatment.** To determine the level of C0-C2 phosphorylation after PKA treatment, Western blot analyses were performed using phosphor-specific antibodies against Ser 273, Ser-282 and Ser-302 sites. **(A)** Representative Western blot analysis of recombinant hC0-C2 proteins using rabbit anti-phosphorylation Ser-273 antibody (anti-Ser273p), anti-phosphorylation Ser-282 antibody (anti-Ser-282p) and anti-phosphorylation Ser-302 antibody (anti-Ser-302p). Total protein levels were determined with rabbit anti-C2-14 (amino acids 2-14 of the C0 domain is the epitope). **(B)** Respective Western blots were further used to determine the total level of hC0-C2 proteins by using mouse anti-His-tag antibodies as the N'-region of hC0-C2 was tagged with His-tag. IR dye 680CD anti-mouse (red) and IR dye 800 CW anti-rabbit (green) were used as reporter or secondary antibody. Results confirmed that C0-C2 proteins were phosphorylated by PKA, compared to untreated controls.

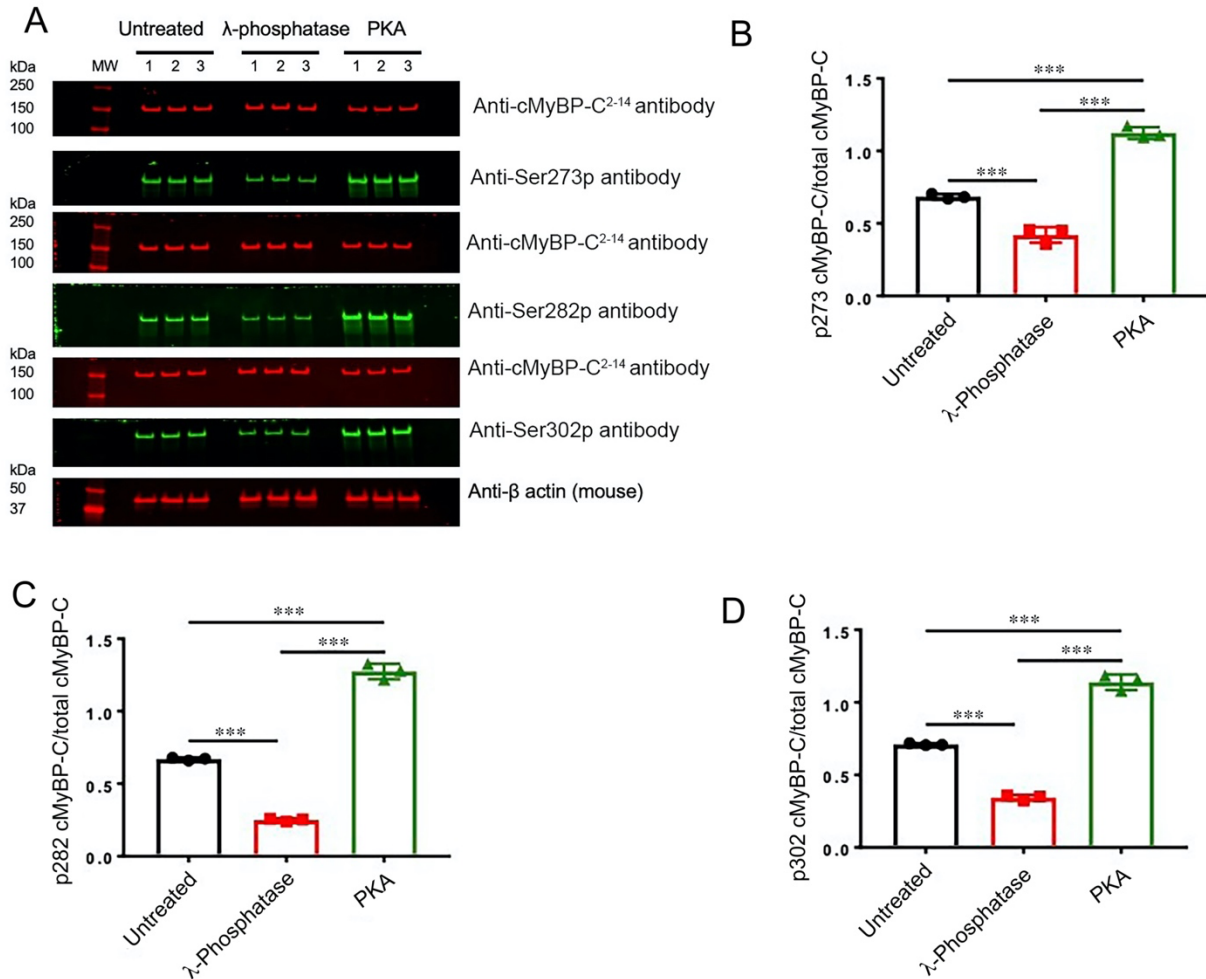

**Figure S5. Phosphorylation of endogenous cMyBP-C protein in skinned papillary fibers by PKA and  $\lambda$ -phosphatase treatment.** (A) To determine whether endogenous cMyBP-C in fibers was phosphorylated, Western blots were performed using protein samples from untreated fibers and fibers treated with either PKA or  $\lambda$ -phosphatase and blotted against either mouse anti-C0 domain and rabbit anti-phosphorylation Ser-273 (anti-Ser273p) antibody or rabbit anti-phosphorylation Ser-282 (anti-Ser282p) antibody or rabbit anti-phosphorylation Ser-302 (anti-Ser302p) antibody. Fibers from three different mice (animal ID: 1, ID: 2 and ID: 3) were used for treatment and loaded on same gel. Mouse antibody against  $\beta$ -actin was used as the loading control. IR dye 680CD anti-mouse (red) and IR dye 800 CW anti-rabbit (green) were used as reporter or secondary antibody. Phosphorylation status of each treatment was calculated by taking the ratio of intensity of bands for Ser-273 (B), Ser-282 (C) and Ser-302 (D) phosphorylation over intensity of the whole cMyBP-C band (top to bottom). Intensity was measured using Image Studio 4. Statistically significant value calculated with one-way ANOVA and Tukey's pooled multiple variance test.  $\pm$  values are S.E.M. for reported values. Refer to Table S2 for analysis of main factors and interactions. (n=3) \*\*\* $P < 0.001$  for mean intensity compared against each group.

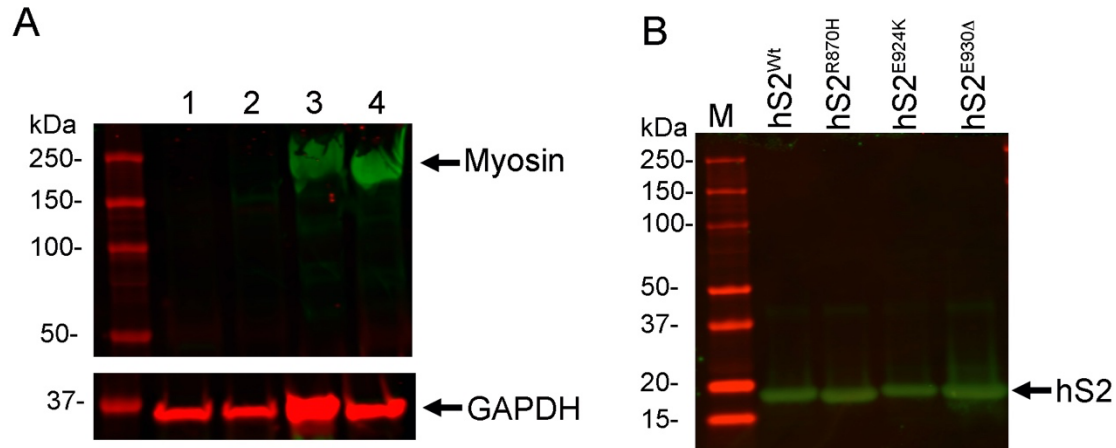

**Figure S6. Validation of newly generated rabbit anti-human S2 antibodies by Western blot analyses.** (A) Whole tissue lysates of liver (Lane 1), small intestine (Lane 2), skeletal gastrocnemius muscle (Lane 3) and heart (Lane 4) were analyzed with the newly generated rabbit anti-human S2 antibody (ProSci Inc, Poway, CA) and glyceraldehyde 3-phosphate dehydrogenase (GAPDH) with mouse anti-GAPDH monoclonal antibody (Fitzgerald Industries International, 10R-G109a). (B) Purified human S2 proteins with their mutant variants, as detected by novel rabbit anti-human S2 antibody. Secondary antibody of IR dye 680CD anti-mouse (red) and IR dye 800 CW anti-rabbit (green) were used. Precision Plus Protein™ Kaleidoscope™ Prestained Protein Standards (BioRad, Cat #1610375) were used for standard molecular weight markers.

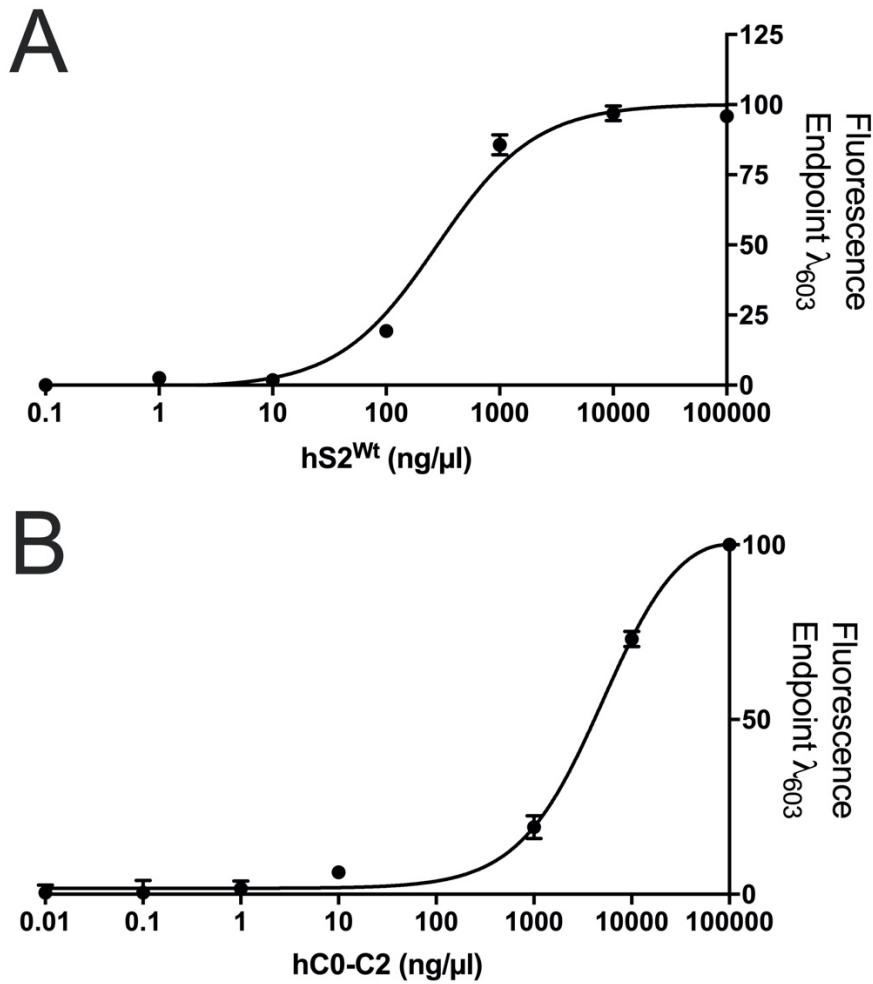

**Figure S7. Detection limits for hS2 and hC0-C2 recombinant proteins by the anti-rabbit S2-specific antibody and C0-C2-specific antibody for SPBA.** (A) hS2 protein was detected from the range of 0 to 6000  $\mu\text{M}$  by primary 1:250 diluted hS2 rabbit antibody, followed by secondary goat anti-rabbit Alexa 563 antibody. (B) hC0-C2 protein was detected from the range of 0 to 2000  $\mu\text{M}$  by primary 1:250 diluted hC0-C2 rabbit antibody, followed by secondary goat anti-rabbit Alexa 563 antibody. The x-axis is expressed in  $\log_{10}$  scale to highlight the detectable range of myosin S2 ( $n = 4$ , fitted to one site: total binding curve by GraphPad Prism).



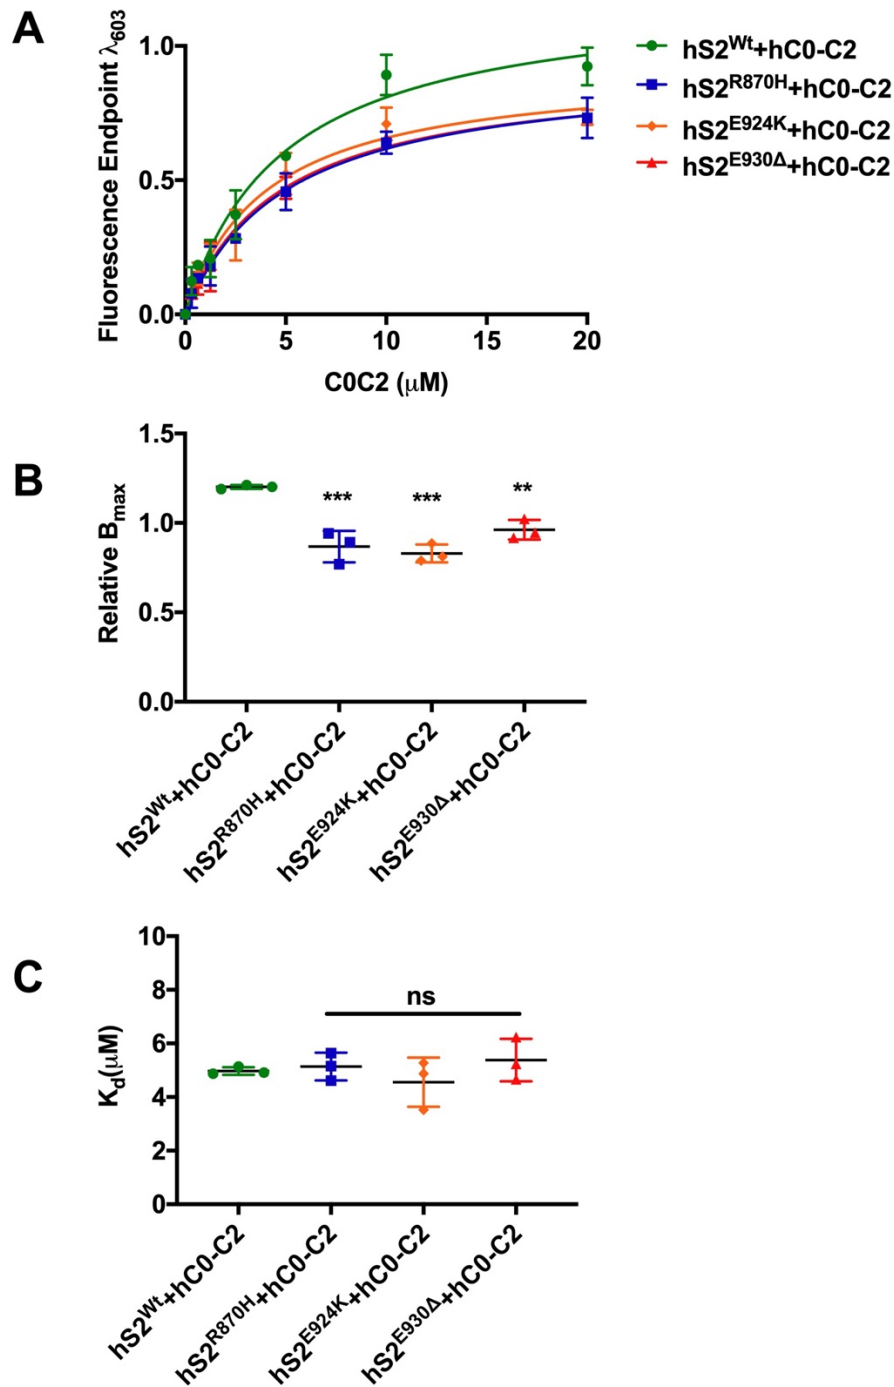

**Figure S8. Binding of hS2 to hC0-C2 proteins.** S2 protein was coated onto the plate and detected by antibody against hC0-C2 protein using SPBA. (A) Binding curve for hS2<sup>Wt</sup> (green), hS2<sup>R870H</sup> (blue), hS2<sup>E924K</sup> (orange) and hS2<sup>E930Δ</sup> (red) to hC0-C2 proteins. (B) Significant decrease in relative  $B_{\max}$  for hS2 mutants. (C) Non-significant change in dissociation constant ( $K_d$ ) for hS2 mutants to hC0-C2 proteins. One-way ANOVA with Tukey's multiple comparison test was performed with single pooled variance.  $n=3$  with triplicates for each hS2 protein. Refer to Table S2 for the one-way ANOVA analysis with main factors and interactions. \* $P < 0.05$ , \*\* $P < 0.01$ , and \*\*\* $P < 0.001$  versus hS2<sup>Wt</sup>/hC0-C2 proteins

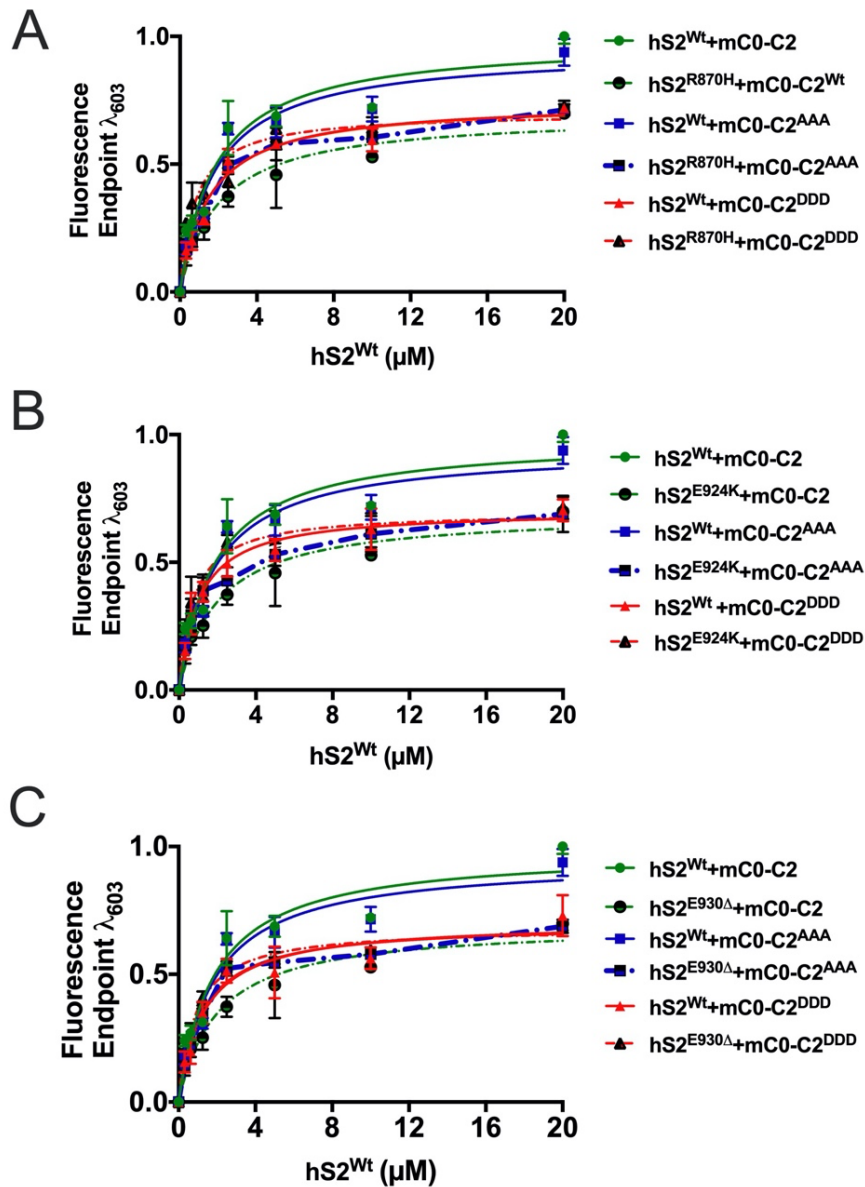

**Figure S9. Binding of hS2 to mC0-C2.** mC0-C2 was coated onto the microtiter plate, and binding was detected by antibody against hS2 protein by SPBA. Binding curve of hS2<sup>Wt</sup> (solid), (A) hS2<sup>R870H</sup> (dotted), (B) hS2<sup>E924K</sup> (dotted) and (C) hS2<sup>E930 $\Delta$</sup>  (dotted) to mC0-C2<sup>Wt</sup> (green), mC0-C2<sup>AAA</sup> (blue) and mC0-C2<sup>DDD</sup>. n=3 with triplicates for each hS2 protein. One-way ANOVA with Tukey's multiple comparison test was performed with single pooled variance. Refer to Table 2 and 7 of main text for comparison of  $B_{max}$  and  $K_d$  values across all binding interactions between hS2 and mC0-C2.

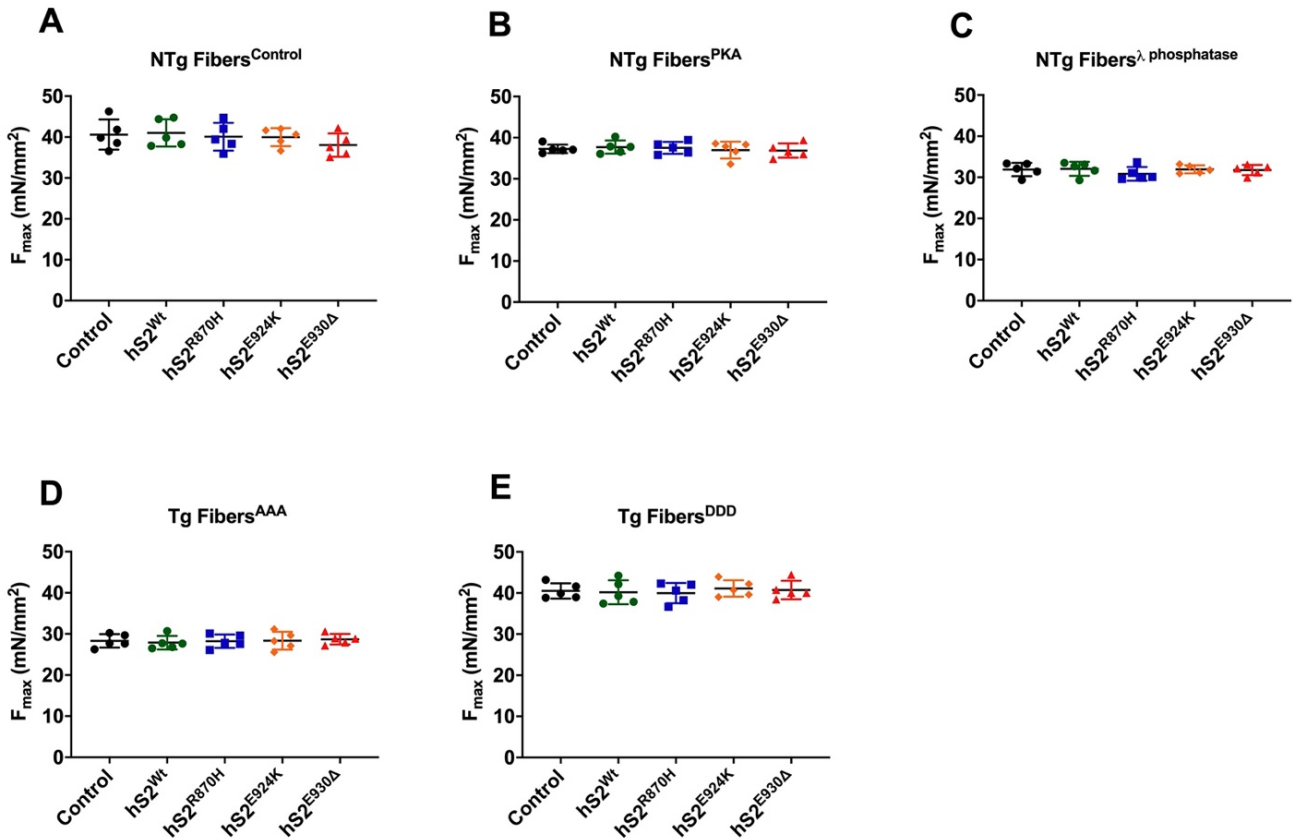

**Figure S10. Maximal force ( $F_{max}$ ) produced per cross section area of fibers treated with 9  $\mu$ M S2 proteins at pCa 4.5.** Non-significant change in force produced in fibers of (A) NTg fibers<sup>control</sup>, (B) NTg fibers<sup>PKA</sup>, (C) NTg fibers <sup>$\lambda$ -phosphatase</sup>, (D) Tg Fibers<sup>AAA</sup> and (E) Tg Fibers<sup>DDD</sup> in the presence of 9  $\mu$ M of hS2<sup>Wt</sup> (green), hS2<sup>R870H</sup> (blue), hS2<sup>E924K</sup> (orange) and hS2<sup>E930Δ</sup> (red). One-way ANOVA with Tukey's multiple comparison test was performed with single pooled variance. n=5, with one fiber per animal. No significance was determined among the groups. Refer to Table S2 for one-way ANOVA analysis with main factors and interactions.

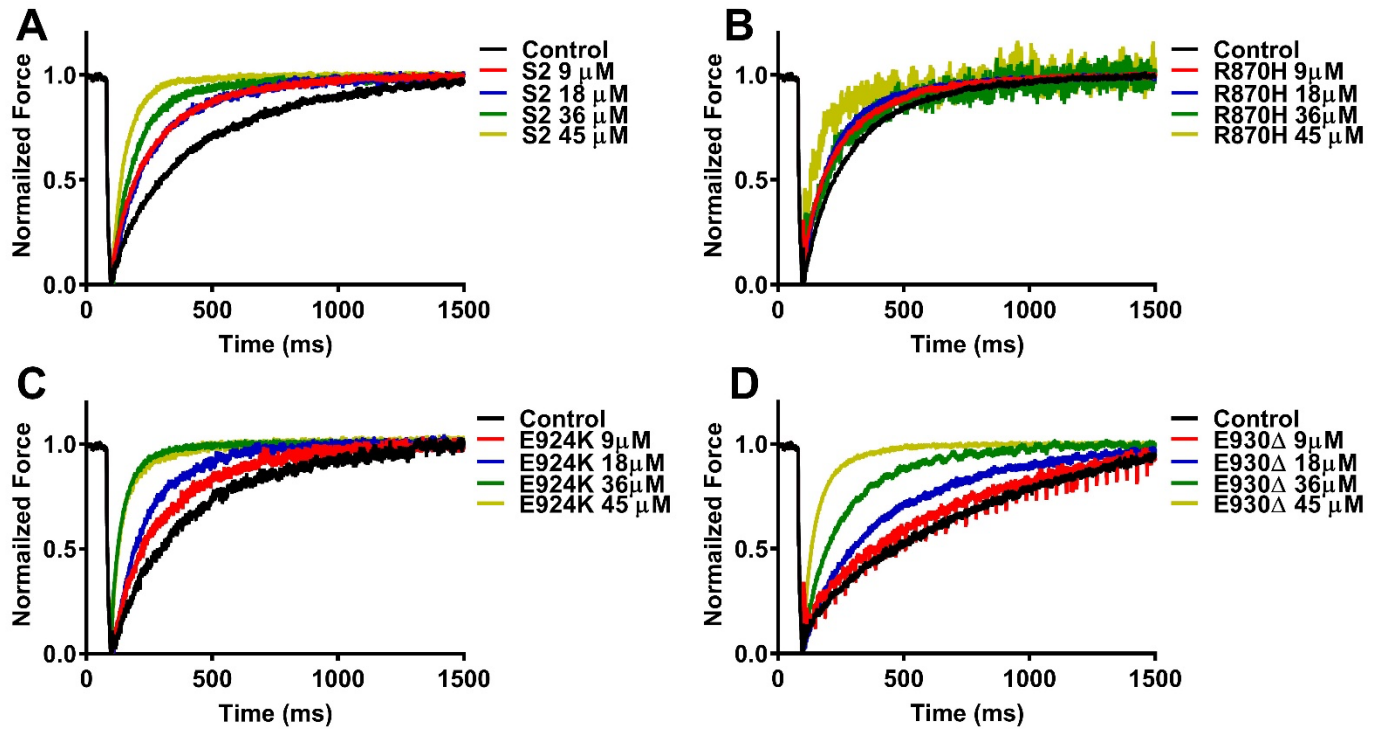

**Figure S11. Dose-dependent effect of S2 proteins over the rate of force redevelopment.** (A-D)  $k_{tr}$  raw traces for fibers that were permeabilized with (9-45  $\mu\text{M}$ )  $S2^{wt}$ ,  $S2^{R870H}$ ,  $S2^{E924K}$  and  $S2^{E930\Delta}$ , with untreated control (black), 9  $\mu\text{M}$  (red), 18  $\mu\text{M}$  (blue), 36  $\mu\text{M}$  (green) and 45  $\mu\text{M}$  (yellow) for each of the S2 proteins.

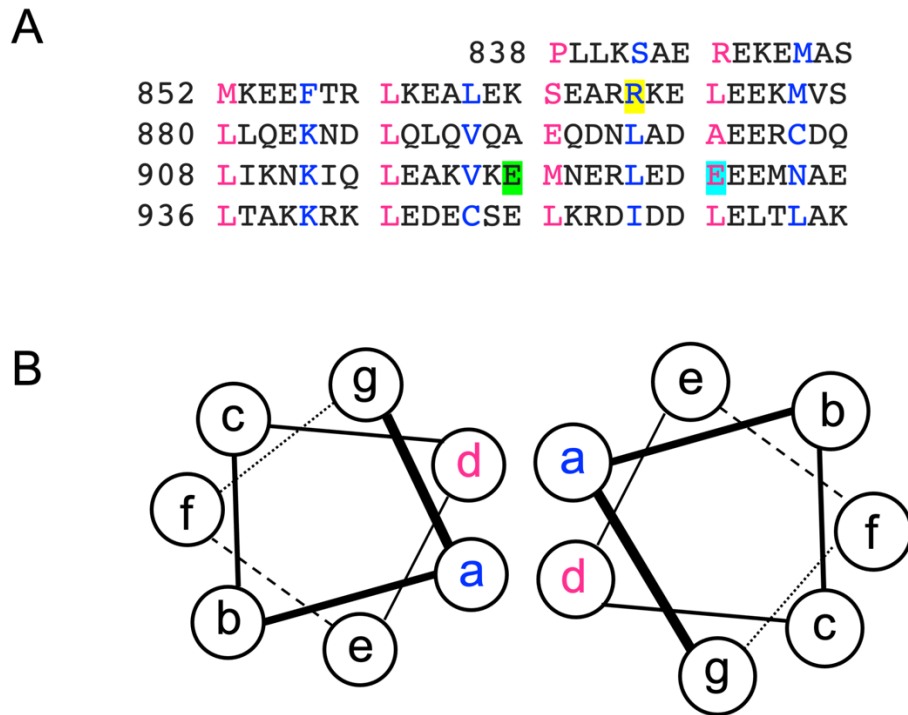

**Figure S12. The heptad repeats of the myosin S2 showing the locations of the three mutations.** **A**, The amino acid sequence of myosin S2 labeled with position a and d which are occupied by hydrophobic residues. The amino acids in position a and d form the hydrophobic residues to stabilize the coiled-coil structure of two  $\alpha$ -helices S2 region. **B**, The 7-fold repeat of both strands is shown. HCM mutations (R870H (Yellow), E924K (green) and E930 $\Delta$  (cyan)) in *MYH7* of human affect positions a, c and d, respectively.



**Table S2. One-way ANOVA analysis with main factors and interactions**

| <b>Suppl Figure;<br/>Panel</b> | <b>F(DFn, DFd)</b> | <b><i>P</i></b> |
|--------------------------------|--------------------|-----------------|
| S5 B (ser-273p)                | F (2, 6) = 231.5   | P<0.0001        |
| S5 B (ser-282p)                | F (2, 6) = 784.6   | P<0.0001        |
| S5 B (ser-302p)                | F (2, 6) = 436.9   | P<0.0001        |
| S7 B                           | F (3, 8) = 24.85   | P=0.0002        |
| S7 C                           | F (3, 8) = 0.8245  | P=0.5163        |
| S10 A                          | F (4, 20) = 0.6605 | P=0.6266        |
| S10 B                          | F (4, 20) = 0.233  | P=0.9165        |
| S10 C                          | F (4, 20) = 0.5405 | P=0.7078        |
| S10 D                          | F (4, 20) = 0.1506 | P=0.9605        |
| S10 E                          | F (4, 20) = 0.1862 | P=0.9429        |

**Table S3: Myosin S2 cDNA primers utilized to generate recombinant hS2 proteins with mutations**

| <b>Mutagenesis Primers</b> | <b>5' to 3' sequence</b> |
|----------------------------|--------------------------|
| Myosin S2_R870H_F          | GAGGCTCGCCACAAGGAGCTG    |
| Myosin S2_R870H_R          | GGACTTCTCTAGCGCCTC       |
| Myosin S2_E924K_F          | GGAGATGAACAAGAGGCTGGAGG  |
| Myosin S2_E924K_R          | TTCACCTTGGCCTCCAGC       |
| Myosin S2_E930Δ_F          | GAGATGAATGCTGAGCTC       |
| Myosin S2_E930Δ_R          | CTCATCCTCCAGCCTCTC       |

DNA sequences were obtained from the UniProt ID:P12883 database.

### References:

1. Homburger, J. R., Green, E. M., Caleshu, C., Sunitha, M. S., Taylor, R. E., Ruppel, K. M., Metpally, R. P., Colan, S. D., Michels, M., Day, S. M., Olivotto, I., Bustamante, C. D., Dewey, F. E., Ho, C. Y., Spudich, J. A., and Ashley, E. A. (2016) Multidimensional structure-function relationships in human beta-cardiac myosin from population-scale genetic variation. *Proc Natl Acad Sci USA* **113**, 6701-6706
2. Trivedi, D. V., Adhikari, A. S., Sarkar, S. S., Ruppel, K. M., and Spudich, J. A. (2018) Hypertrophic cardiomyopathy and the myosin mesa: viewing an old disease in a new light. *Biophys Rev* **10**, 27-48
